# Supplementary material for: Upcycling of low value end-of-life cathode material into next generation cathode materials
Source: Royal Society of Chemistry journal article supplement (doi:10.1039/d4su00041b), 2024-01-01
Supplement: d4su00041b1.pdf [file d4su00041b1.pdf]

# Upcycling of low value end-of-life cathode material into next generation cathode materials

R. Madge, A. Jarvis, W. Lima da Silva, L. L. Driscoll, P. A. Anderson and P. R. Slater

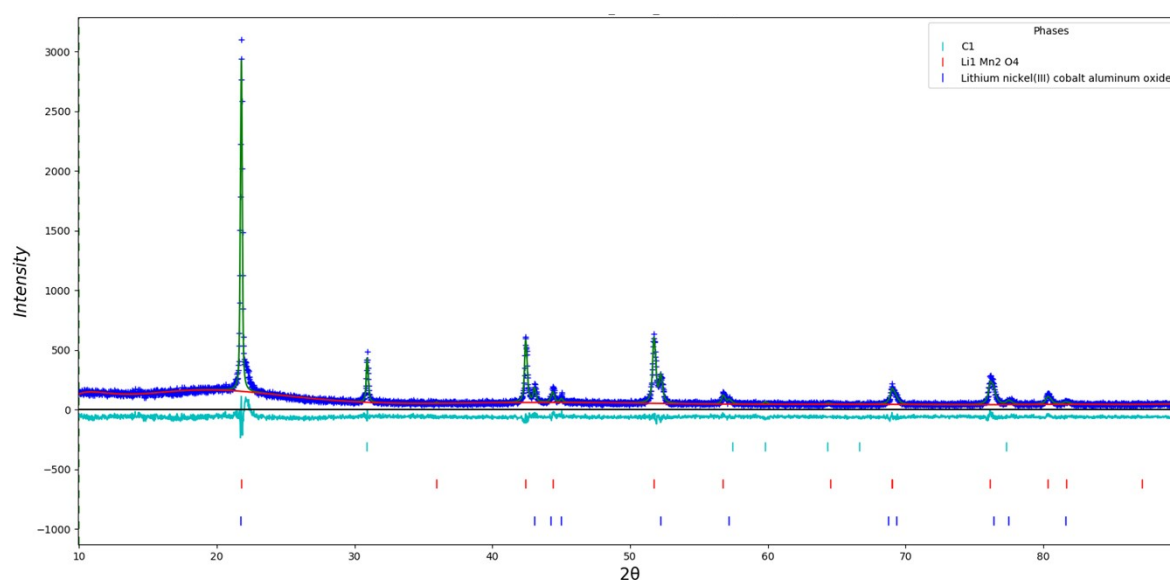

Figure S1: Rietveld refinement plot of end-of-life cathode.

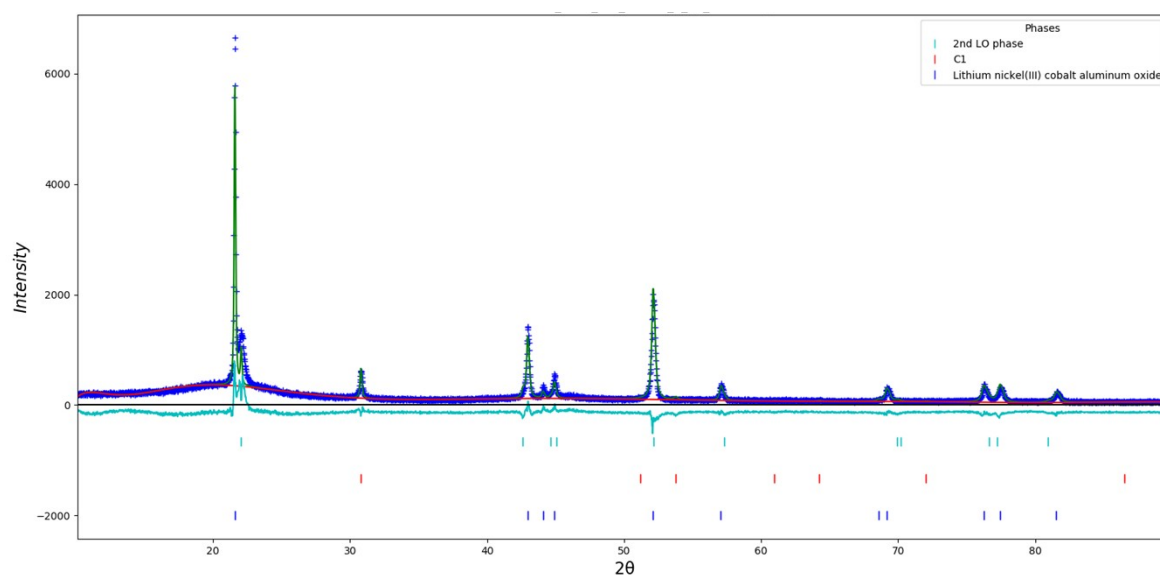

Figure S2: Rietveld refinement plot of end-of-life cathode after 20 mins of leaching.

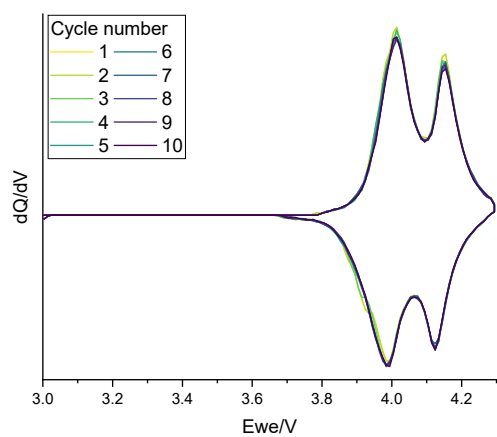

Figure S3:  $dQ/dV$  for recovered LMO when cycled at  $10 \text{ mA g}^{-1}$  between 3-4.3 V

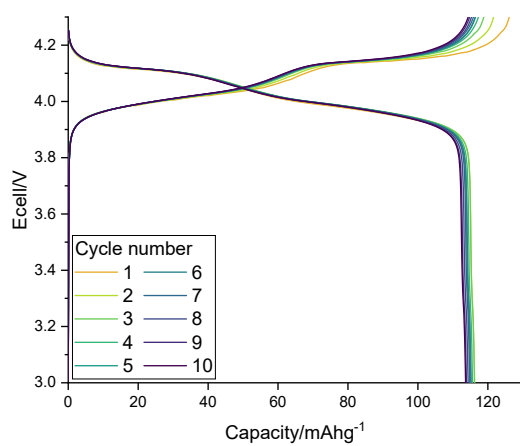

Figure S4: Galvanostatic charge-discharge profiles for LMO made from pristine starting materials. Cells were cycled at  $10 \text{ mA g}^{-1}$  between 3-4.3 V.

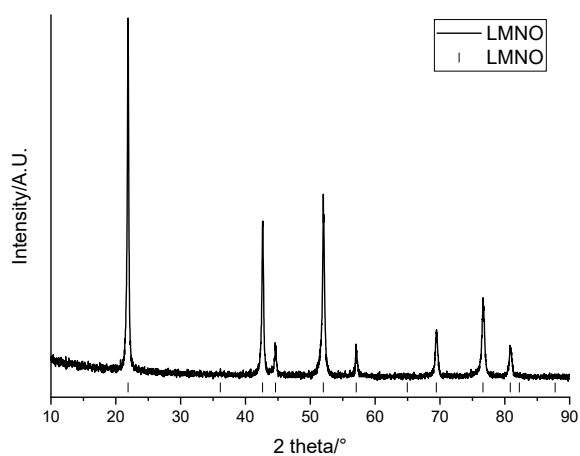

Figure S5: XRD pattern of  $\text{LiMn}_{1.5}\text{Ni}_{0.5}\text{O}_4$  made from LMO recovered from a Quality Control Rejected cell (Co  $K\alpha$ ). Tick marks correspond to LMNO (black).

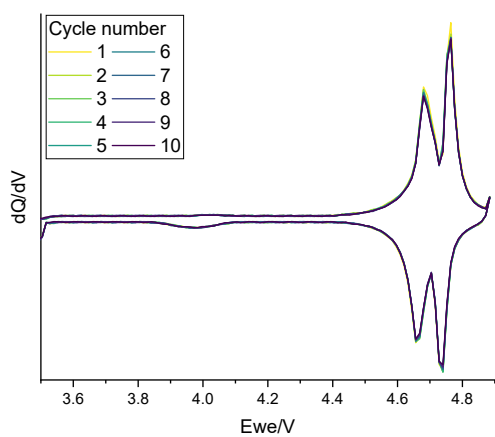

Figure S6:  $dQ/dV$  for LMNO when cycled at  $10 \text{ mA g}^{-1}$  between 3-4.3 V

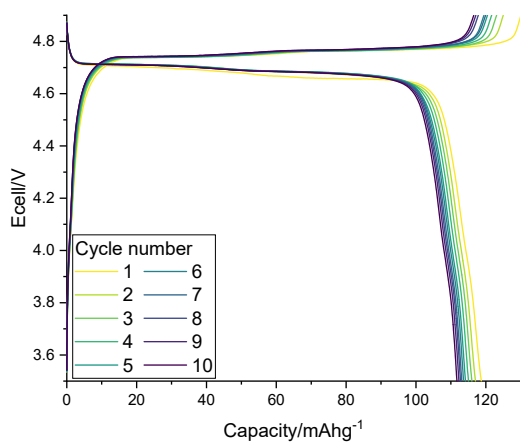

Figure S7: Galvanostatic charge-discharge profile for LMNO made from pristine starting materials. Cells were cycled at  $10 \text{ mA g}^{-1}$  between 3.5-4.9 V.

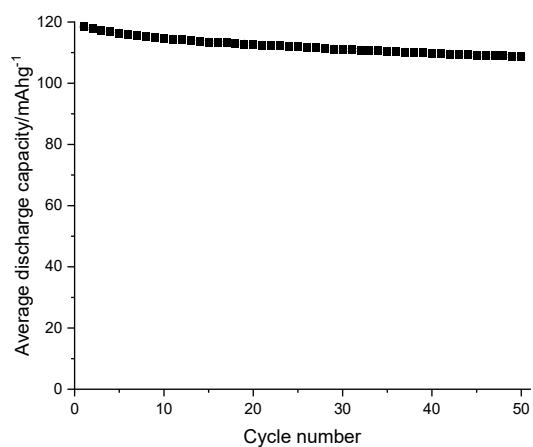

Figure S8: Average gravimetric discharge capacity against cycle number for upcycled LMNO made from recovered LMO. Cells were cycled at  $10 \text{ mA g}^{-1}$  between 3.5-4.9 V.

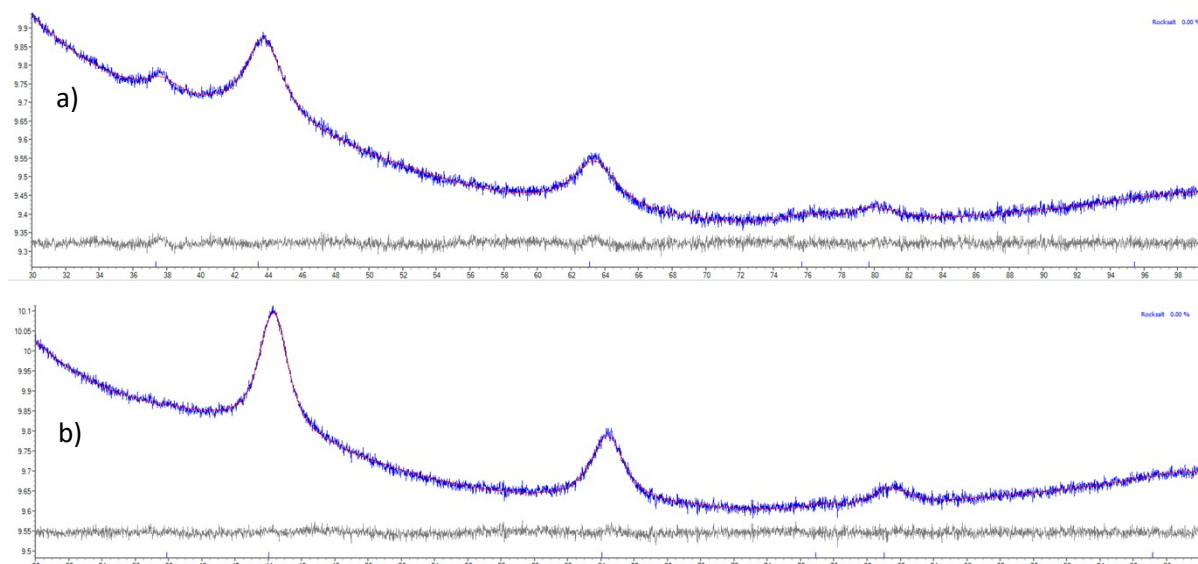

Figure S9: Pawley refinement plots of recovered a)  $\text{Li}_4\text{Mn}_2\text{O}_5$  and b)  $\text{Li}_2\text{MnO}_{2.25}\text{F}$ .

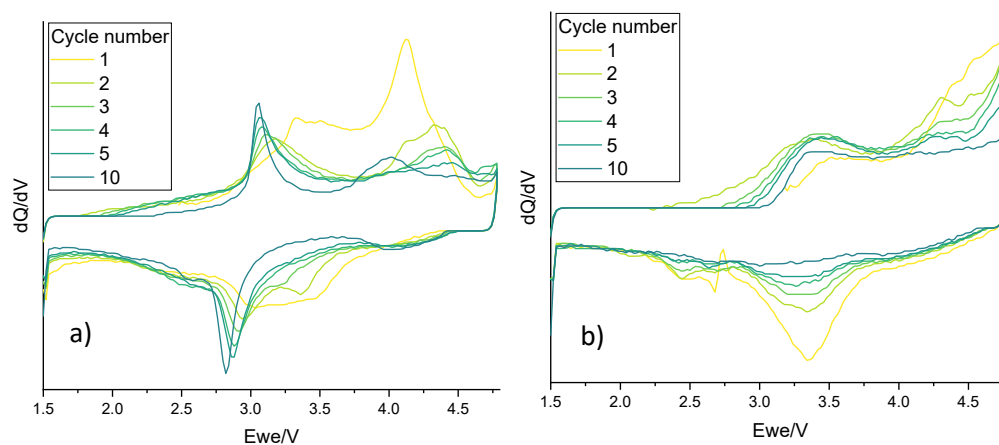

Figure S10:  $dQ/dV$  for a)  $\text{Li}_4\text{Mn}_2\text{O}_5$  and b)  $\text{Li}_2\text{MnO}_{2.25}\text{F}$  when cycled at  $10 \text{ mA g}^{-1}$  between 3-4.3 V

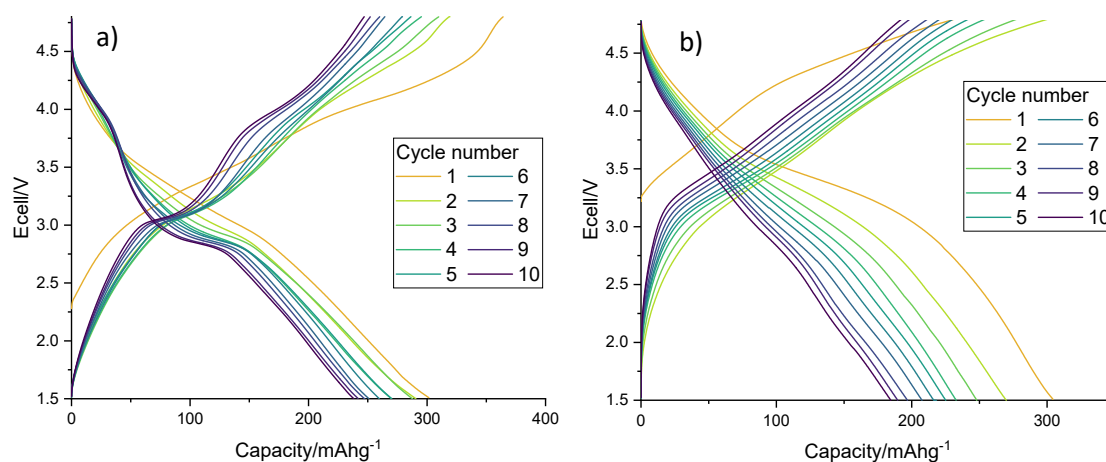

Figure S11: Galvanostatic charge-discharge profiles for a)  $\text{Li}_4\text{Mn}_2\text{O}_5$  and b)  $\text{Li}_2\text{MnO}_{2.25}\text{F}$  made from pristine starting materials. Cells were cycled at  $10 \text{ mA g}^{-1}$  between 1.5-4.8 V.

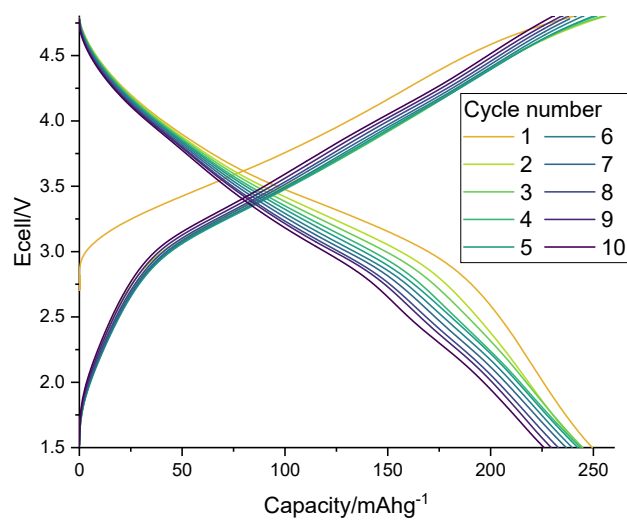

Figure S12: Galvanostatic charge-discharge profile for  $\text{Li}_{1.8}\text{Na}_{0.2}\text{MnO}_2\text{F}$  made from pristine starting materials. Cells were cycled at  $10 \text{ mA g}^{-1}$  between 1.5-4.8 V.

Table S1: Pawley refinement results for the lattice parameters of  $\text{LiMn}_2\text{O}_4$  and layered oxide phase at different leaching times

| Lattice parameters |                                        |                     |             |
|--------------------|----------------------------------------|---------------------|-------------|
| Leaching time/mins | LiMn <sub>2</sub> O <sub>4</sub> phase | Layered oxide phase |             |
|                    | <i>a</i> /Å                            | <i>a</i> /Å         | <i>c</i> /Å |
| 0                  | 8.208(4)                               | 2.859(5)            | 14.263(1)   |
| 5                  | 8.177(1)                               | 2.857(6)            | 14.267(2)   |
| 10                 | 8.201(2)                               | 2.856(7)            | 14.273(4)   |
| 15                 | 8.204(2)                               | 2.859(4)            | 14.286(2)   |
| 20                 | /                                      | 2.857(3)            | 14.272(2)   |

Table S2: ICP-OES results showing the concentration of each element in solution at different leaching times

| Concentration in solution/ppm |        |          |        |        |        |
|-------------------------------|--------|----------|--------|--------|--------|
| Leaching time/mins            | Li     | Mn       | Ni     | Co     | Al     |
| 5                             | 436.95 | 4759.12  | 61.06  | 97.61  | 82.02  |
| 10                            | 672.50 | 8804.06  | 90.41  | 174.25 | 128.30 |
| 15                            | 852.90 | 12018.49 | 156.85 | 240.55 | 195.16 |
| 20                            | 891.89 | 12571.27 | 287.72 | 273.18 | 220.88 |
